# Supplementary material for: Translation, and validation of Dysphagia Outcome and Severity Scale (DOSS): Swedish version
Source: PubMed Central journal article supplement (PMC10720115; doi:10.1186/s13104-023-06637-z), 2023-12-14
Supplement: 13104_2023_6637_MOESM1_ESM.pdf [file 13104_2023_6637_MOESM1_ESM.pdf]

## Dysphagia Outcome and Severity Scale - Swedish (DOSS-S)

---

Total peroral nutrition: Normalkost (utan anpassning)

---

**Nivå 7:** Normal sväljfunktion i alla situationer.

- Normalkost (utan anpassning)
- Behöver inga strategier eller extra tid

**Nivå 6:** Funktionell sväljning. Kompenserar självständigt.

- Normalkost (utan anpassning), funktionell sväljning
- Kan behöva extra tid under måltider
- Patienten kan ha lätt fördröjd oral eller faryngeal fas, retention eller spår av retention på den laryngeala delen av epiglottis men kompenserar eller sväljer rent, självständigt och spontant
- Ingen aspiration eller penetration vid någon konsistens

---

Total peroral nutrition: Anpassad kost med visst stöd

---

**Nivå 5:** Lätt dysfagi: Viss tillsyn. Kan behöva avstå från en konsistens.

Kan uppvisa ett eller flera av följande symtom:

- Lätt oral dysfagi med nedsatt tuggfunktion och/eller oral retention som rensas undan spontant
- Penetration ovanför stämbandsnivå vid en eller flera konsistenser eller till stämbandsnivå vid en konsistens, men som rensas undan spontant under sväljning\*
- Aspiration vid enbart tunnflytande vätska, men med kraftig reflexmässig hosta som rensar helt och hållet
- Faryngeal retention som rensas undan spontant

**Nivå 4:** Lätt-måttlig dysfagi: Emellanåt behov av uppmaningar under måltid. Behöver avstå från en eller två konsistenser.

Kan uppvisa ett eller flera av följande symtom:

- Oral retention som rensas undan på uppmaning
- Aspiration vid en konsistens, med svag eller utebliven reflexmässig hosta
  - Eller penetration till stämbandsnivå med hosta vid två konsistenser
  - Eller penetration till stämbandsnivå med utebliven hosta vid en konsistens
- Faryngeal retention som rensas undan på uppmaning

**Nivå 3:** Måttlig dysfagi: Behov av fullständig stöttning, tillsyn eller tillämpning av strategier. Behöver avstå från två eller flera konsistenser.

Kan uppvisa ett eller flera av följande symtom:

- Måttlig oral retention som rensas undan på uppmaning
- Penetration till stämbandsnivå med utebliven hosta vid två eller flera konsistenser
  - Eller aspiration vid två konsistenser med svag eller utebliven reflexmässig hosta
  - Eller aspiration vid en konsistens med utebliven hosta samt penetration till stämbandsnivå vid en konsistens med utebliven hosta
- Måttlig faryngeal retention som rensas undan på uppmaning

---

Behov av alternativ nutrition

---

**Nivå 2:** Måttlig-grav dysfagi: Behov av fullständig stöttning eller tillämpning av strategier. Endast delvist oralt intag (sväljer minst en konsistens säkert med total tillämpning av strategier).

Kan uppvisa ett eller flera av följande symtom:

- Gravt oralt spill eller retention i den orala fasen, rensar ej undan eller behov av flera uppmaningar
- Aspiration vid två eller flera konsistenser, utebliven reflexmässig hosta, svag viljemässig hosta
  - Eller aspiration vid en eller flera konsistenser med utebliven hosta samt penetration till stämbandsnivå vid en eller flera konsistenser med utebliven hosta
- Grav faryngeal retention, rensar ej undan eller behov av flera uppmaningar

**Nivå 1:** Grav dysfagi: Noll per os: Sväljer inte någon konsistens på ett säkert sätt.

Kan uppvisa ett eller flera av följande symtom:

- Gravt oralt spill eller retention i den orala fasen, rensar ej undan
- Tyst aspiration vid två eller flera konsistenser, icke funktionell viljemässig hosta
- Grav faryngeal retention, rensar ej undan
- Ingen sväljning ses

\* Kan ej observeras genom Funktionell endoskopisk Undersökning av Sväljningen (FUS), men genom videofluoroskopi (VFS/TVSS)
