# Supplementary material for: Translation, and validation of Dysphagia Outcome and Severity Scale (DOSS): Swedish version
Source: PubMed Central journal article supplement (PMC10720115; doi:10.1186/s13104-023-06637-z), 2023-12-14

**Figure S1.** *Flow Diagram.*

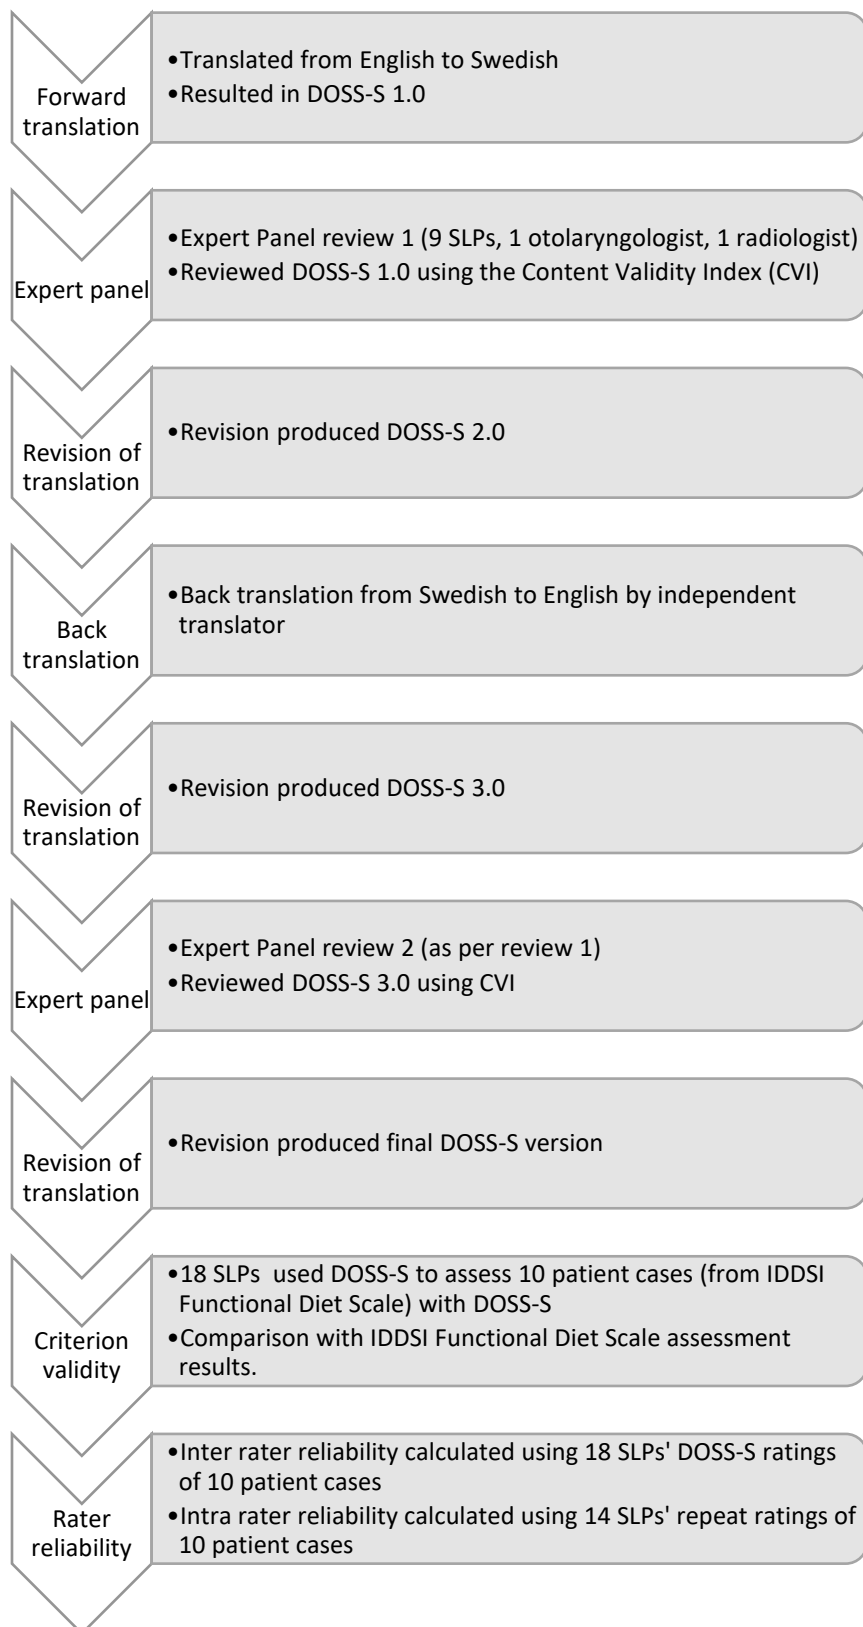

Supplement: 13104_2023_6637_MOESM2_ESM.pdf [file 13104_2023_6637_MOESM2_ESM.pdf]
